# Supplementary material for: Effects of downstream genes on synthetic genetic circuits
Source: PubMed Central journal article supplement (PMC4290693; doi:10.1186/1752-0509-8-s4-s4), 2014-12-08
Supplement: 1752-0509-8-S4-S4-S1.pdf [file 1752-0509-8-S4-S4-S1.pdf]

# (Additional File 1) Reporter-containing model

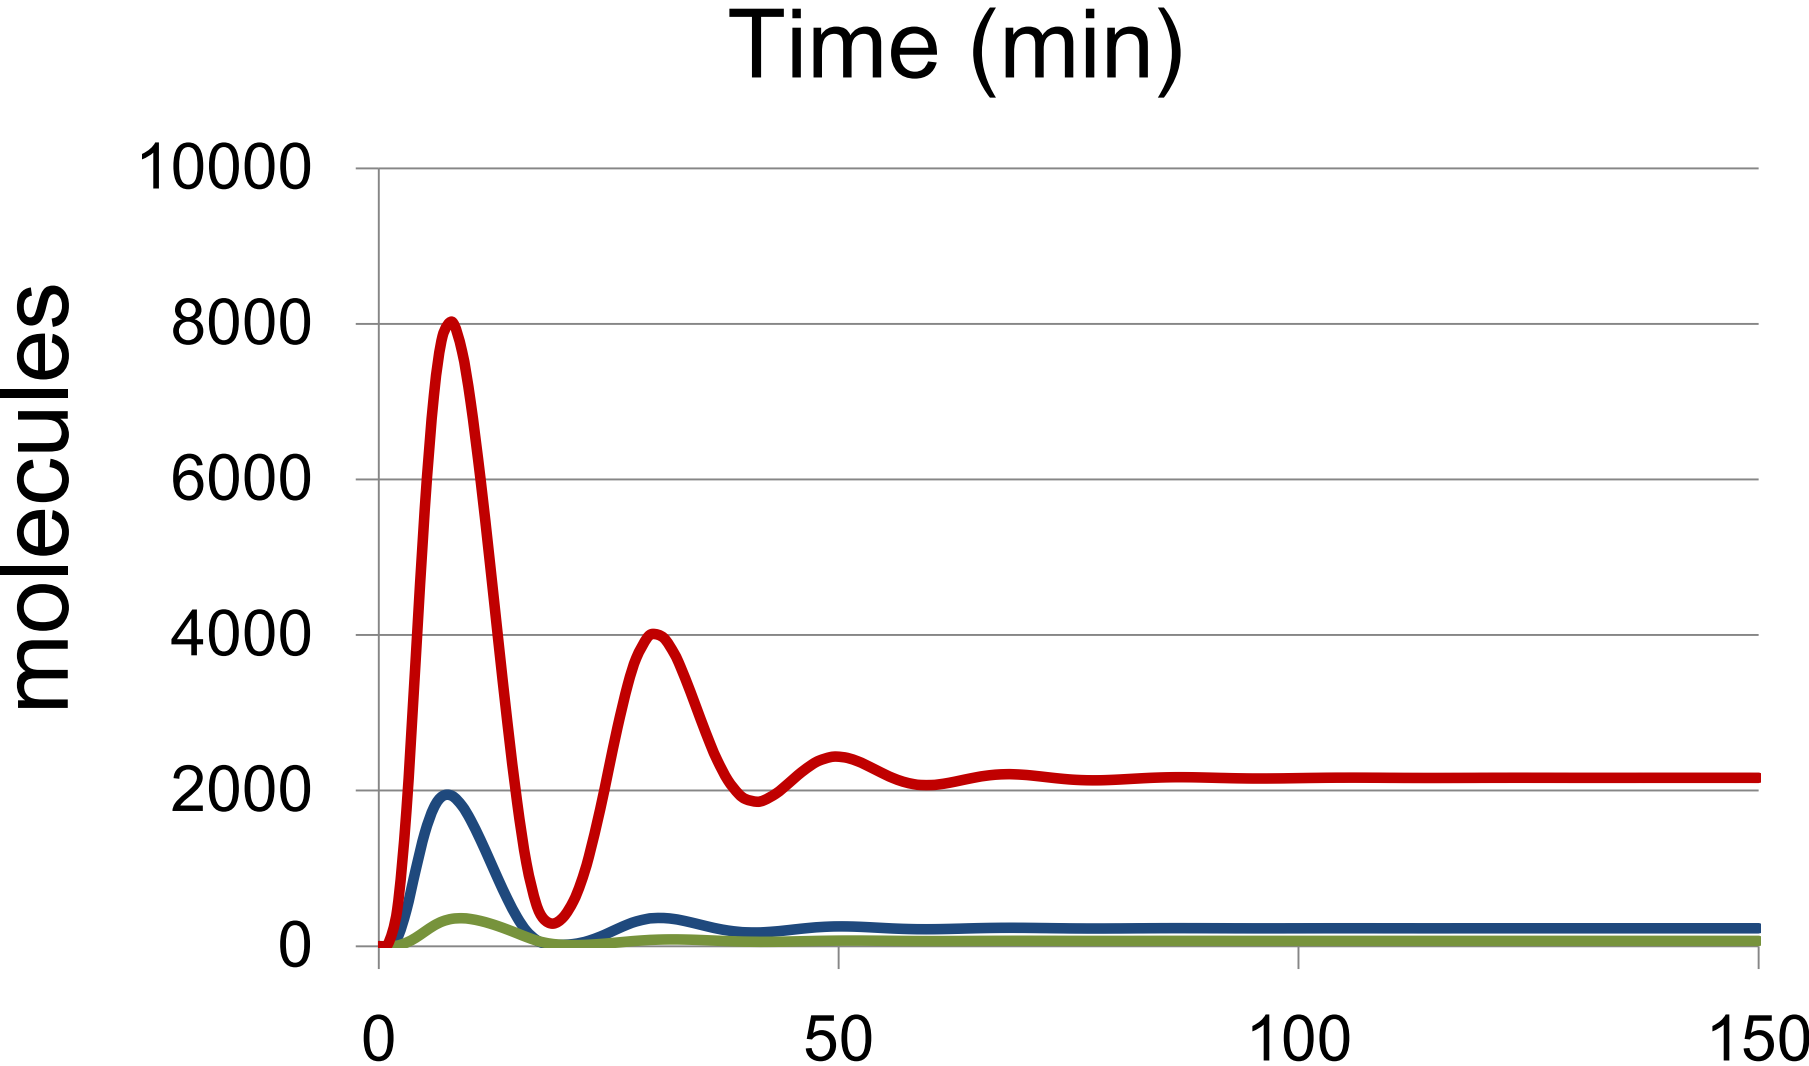

This time course was performed at 0.0% arabinose and 10 mM IPTG.
