# Supplementary material for: Effects of downstream genes on synthetic genetic circuits
Source: PubMed Central journal article supplement (PMC4290693; doi:10.1186/1752-0509-8-s4-s4), 2014-12-08
Supplement: 1752-0509-8-S4-S4-S3.pdf [file 1752-0509-8-S4-S4-S3.pdf]

### Additional File 3. Parameters used for the simulations

| Parameter name           | Parameter value | Description                               | Units                                     |
|--------------------------|-----------------|-------------------------------------------|-------------------------------------------|
| ba, br, bd               | 0.36            | transcription rate                        | min <sup>-1</sup>                         |
| $\alpha$                 | 20              | coefficient of active promoter            |                                           |
| $k_{-a}, k_r$            | 1.8             | protein–promoter unbinding rate           | min <sup>-1</sup>                         |
| $t_a, t_r, t_d$          | 90              | translation rate                          | min <sup>-1</sup>                         |
| $d_a, d_r, d_d$          | 0.54            | mRNA degradation rate                     | min <sup>-1</sup>                         |
| $k_{fa}, k_{fr}, k_{fd}$ | 0.9             | folding rate                              | min <sup>-1</sup>                         |
| $k_{da}, k_{dr}, k_t$    | 0.018           | multimerization rate                      | min <sup>-1</sup> molecules <sup>-1</sup> |
| $k_{-da}, k_{-dr}, k_t$  | 0.00018         | multimer dissociation rate                | min <sup>-1</sup>                         |
| $k_l$                    | 0.36            | loop forming rate                         | min <sup>-1</sup>                         |
| $k_{ul}$                 | 0.18            | loop dissociation rate                    | min <sup>-1</sup>                         |
| $\gamma$                 | 1080            | maximum degradation rate                  | molecules · min <sup>-1</sup>             |
| $c_e$                    | 0.1             | dissociation constant                     | molecules                                 |
| $\lambda$                | 2.5             | coefficient of degradation rate           |                                           |
| $\varepsilon$            | 0.2             | coefficient of degradation rate           |                                           |
| $N_a$                    | 50              | copy number of activator gene             |                                           |
| $N_r$                    | 25              | copy number of repressor gene             |                                           |
| $N_d$                    | 50              | copy number of downstream gene            |                                           |
| $C_r^{max}$              | 0.2             | maximum affinity of LacI for the promoter | molecules <sup>-1</sup>                   |
| $C_r^{min}$              | 0.01            | minimum affinity of LacI for the promoter | molecules <sup>-1</sup>                   |

|             |       |                                              |                         |
|-------------|-------|----------------------------------------------|-------------------------|
| [IPTG]      | 0–10  | IPTG concentration                           | mM                      |
| $k_{r1}$    | 0.035 | correction constant of<br>IPTG               | mM                      |
| $b_1$       | 2     | Hill coefficient of<br>inhibition by LacI    |                         |
| $C_a^{max}$ | 1     | maximum affinity of AraC<br>for the promoter | molecules <sup>-1</sup> |
| $C_a^{min}$ | 0     | minimum affinity of AraC<br>for the promoter | molecules <sup>-1</sup> |
| [ara]       | 0–2   | arabinose concentration                      | % (w/v)                 |
| $k_{a1}$    | 2.5   | correction constant of<br>arabinose          | % (w/v)                 |
| $c_1$       | 2     | Hill coefficient of<br>activation by AraC    |                         |
| $b_2$       | 2     | Hill coefficient of<br>inhibition by LacI    |                         |

---
